# Supplementary material for: Strategies to reduce stigma and discrimination in sexual and reproductive healthcare settings: A mixed-methods systematic review
Source: PLOS journal article supplement (doi:10.1371/journal.pgph.0000582), 2022-06-15
Supplement: S3 (10.1371/journal.pgph.0000582.s003) [file journal.pgph.0000582.s003]

## S5 Appendix. Critical appraisal of qualitative studies (CASP)

| Author, year               | Was there a statement of the aims of the research? <sup>1</sup> | Given the aim of the study, was a qualitative methodology appropriate? <sup>1</sup> | Was the research design appropriate to address the aims of the research? <sup>1</sup> | Were the data collected in a way that addressed the research issue? <sup>1</sup>                                                          | Was the recruitment strategy appropriate to the aims of the research? <sup>1</sup> | Was the relationship between the researcher and participants adequately considered? <sup>1</sup> | Have ethical issues been taken into consideration? <sup>1</sup> | Was the data analysis sufficiently rigorous? <sup>1</sup>    | Were the findings supported by the evidence? <sup>1</sup> | Overall concerns <sup>2</sup> |
|----------------------------|-----------------------------------------------------------------|-------------------------------------------------------------------------------------|---------------------------------------------------------------------------------------|-------------------------------------------------------------------------------------------------------------------------------------------|------------------------------------------------------------------------------------|--------------------------------------------------------------------------------------------------|-----------------------------------------------------------------|--------------------------------------------------------------|-----------------------------------------------------------|-------------------------------|
| Harris 2011 & Debbink 2016 | Yes                                                             | Yes                                                                                 | Yes                                                                                   | Partial:<br>Unclear where the workshops were facilitated, how they were conducted, & type of data generated. No discussion of saturation. | Yes                                                                                | Yes                                                                                              | Yes                                                             | Partial:<br>Limited discussion of the data analysis approach | Yes                                                       | Moderate concerns             |
| Littman 2009               | Yes                                                             | Yes                                                                                 | Yes                                                                                   | Yes                                                                                                                                       | Yes                                                                                | No: No discussion of reflexivity                                                                 | Yes                                                             | Yes                                                          | Yes                                                       | Minor concerns                |

<sup>1</sup> Yes, no, partial or unclear. If no, partial or unclear, explain what is missing

<sup>2</sup> Overall assessment: no or very minor concerns, minor concerns, moderate concerns, serious concerns
